# Supplementary material for: Olfactory receptor neurons generate multiple response motifs, increasing coding space dimensionality
Source: eLife journal article supplement (doi:10.7554/elife.79152), 2023-01-31

Excitatory Motif (51 Odor-ORN pairs)

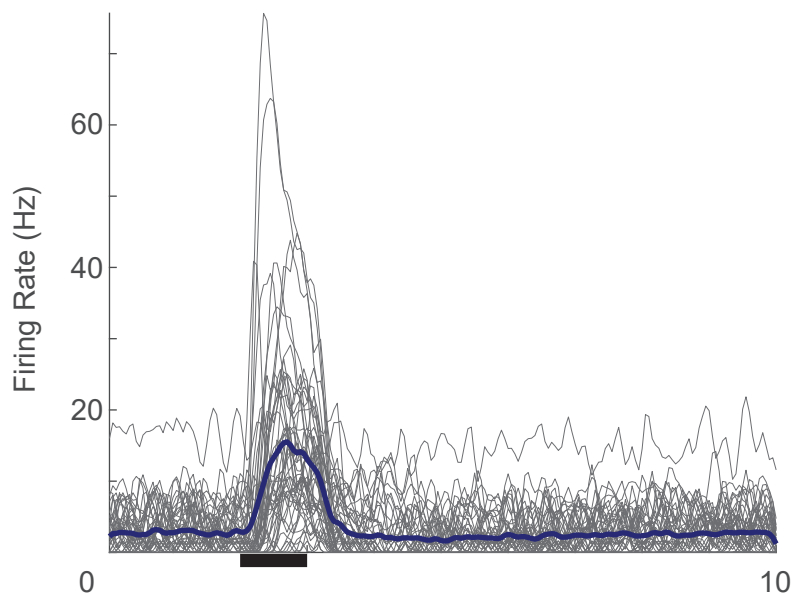

Delayed Motif (27 Odor-ORN pairs)

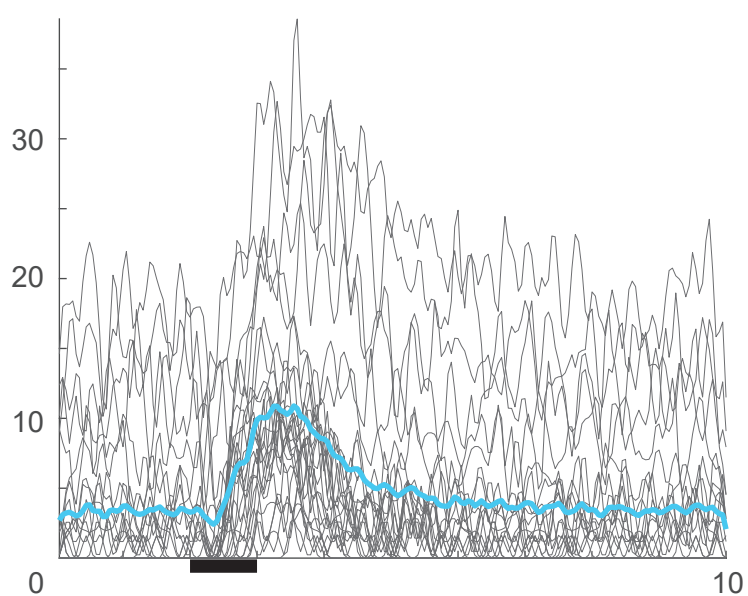

Offset Motif (100 Odor-ORN pairs)

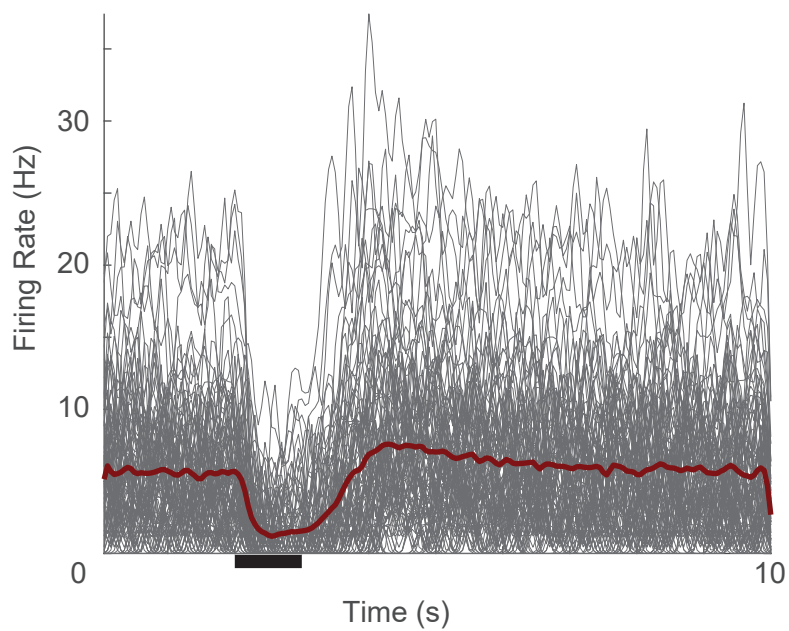

Inhibitory Motif (20 Odor-ORN pairs)

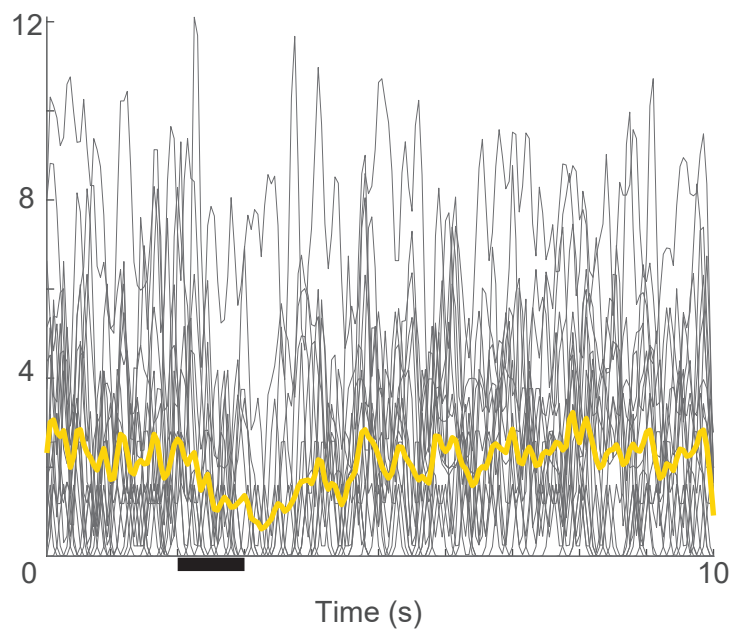

Supplement: supp [file elife-79152-supp-v1.zip]
