# Supplementary material for: Olfactory receptor neurons generate multiple response motifs, increasing coding space dimensionality
Source: eLife journal article supplement (doi:10.7554/elife.79152), 2023-01-31

A

Distance between responses

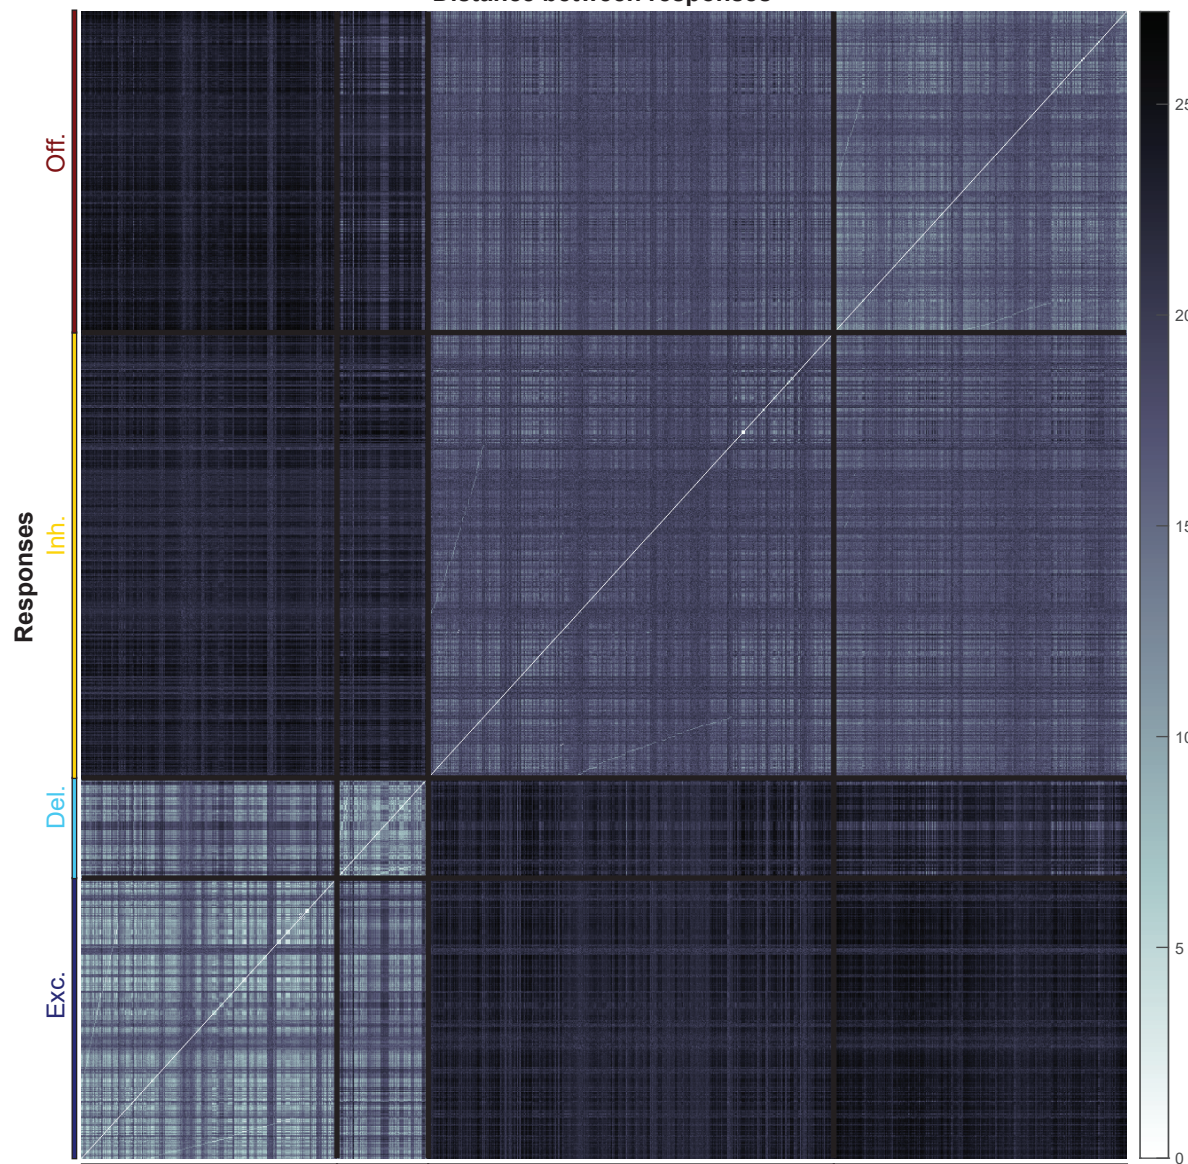

Responses

B

Clusters are significant subsets

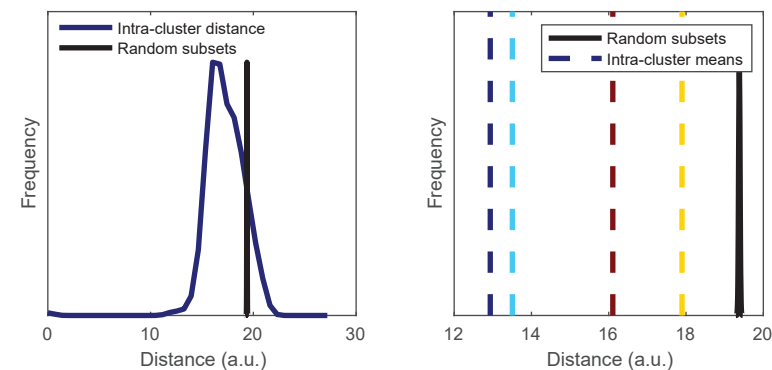

C

Clusters are distinct from each other

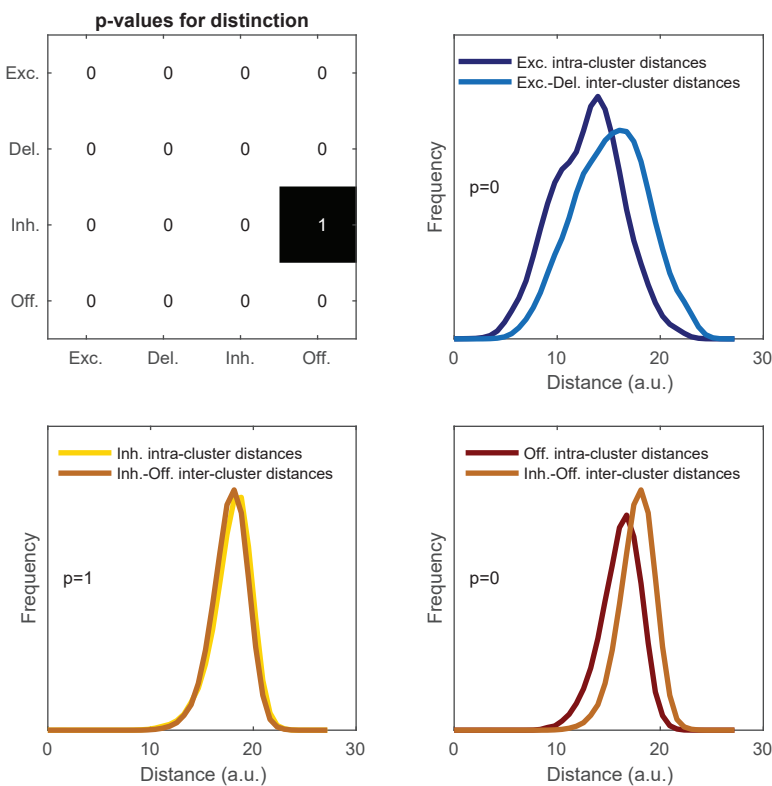

Supplement: supp [file elife-79152-supp-v1.zip]
