# Supplementary figures and images for: Olfactory receptor neurons generate multiple response motifs, increasing coding space dimensionality
Source: eLife journal article supplement (doi:10.7554/elife.79152), 2023-01-31

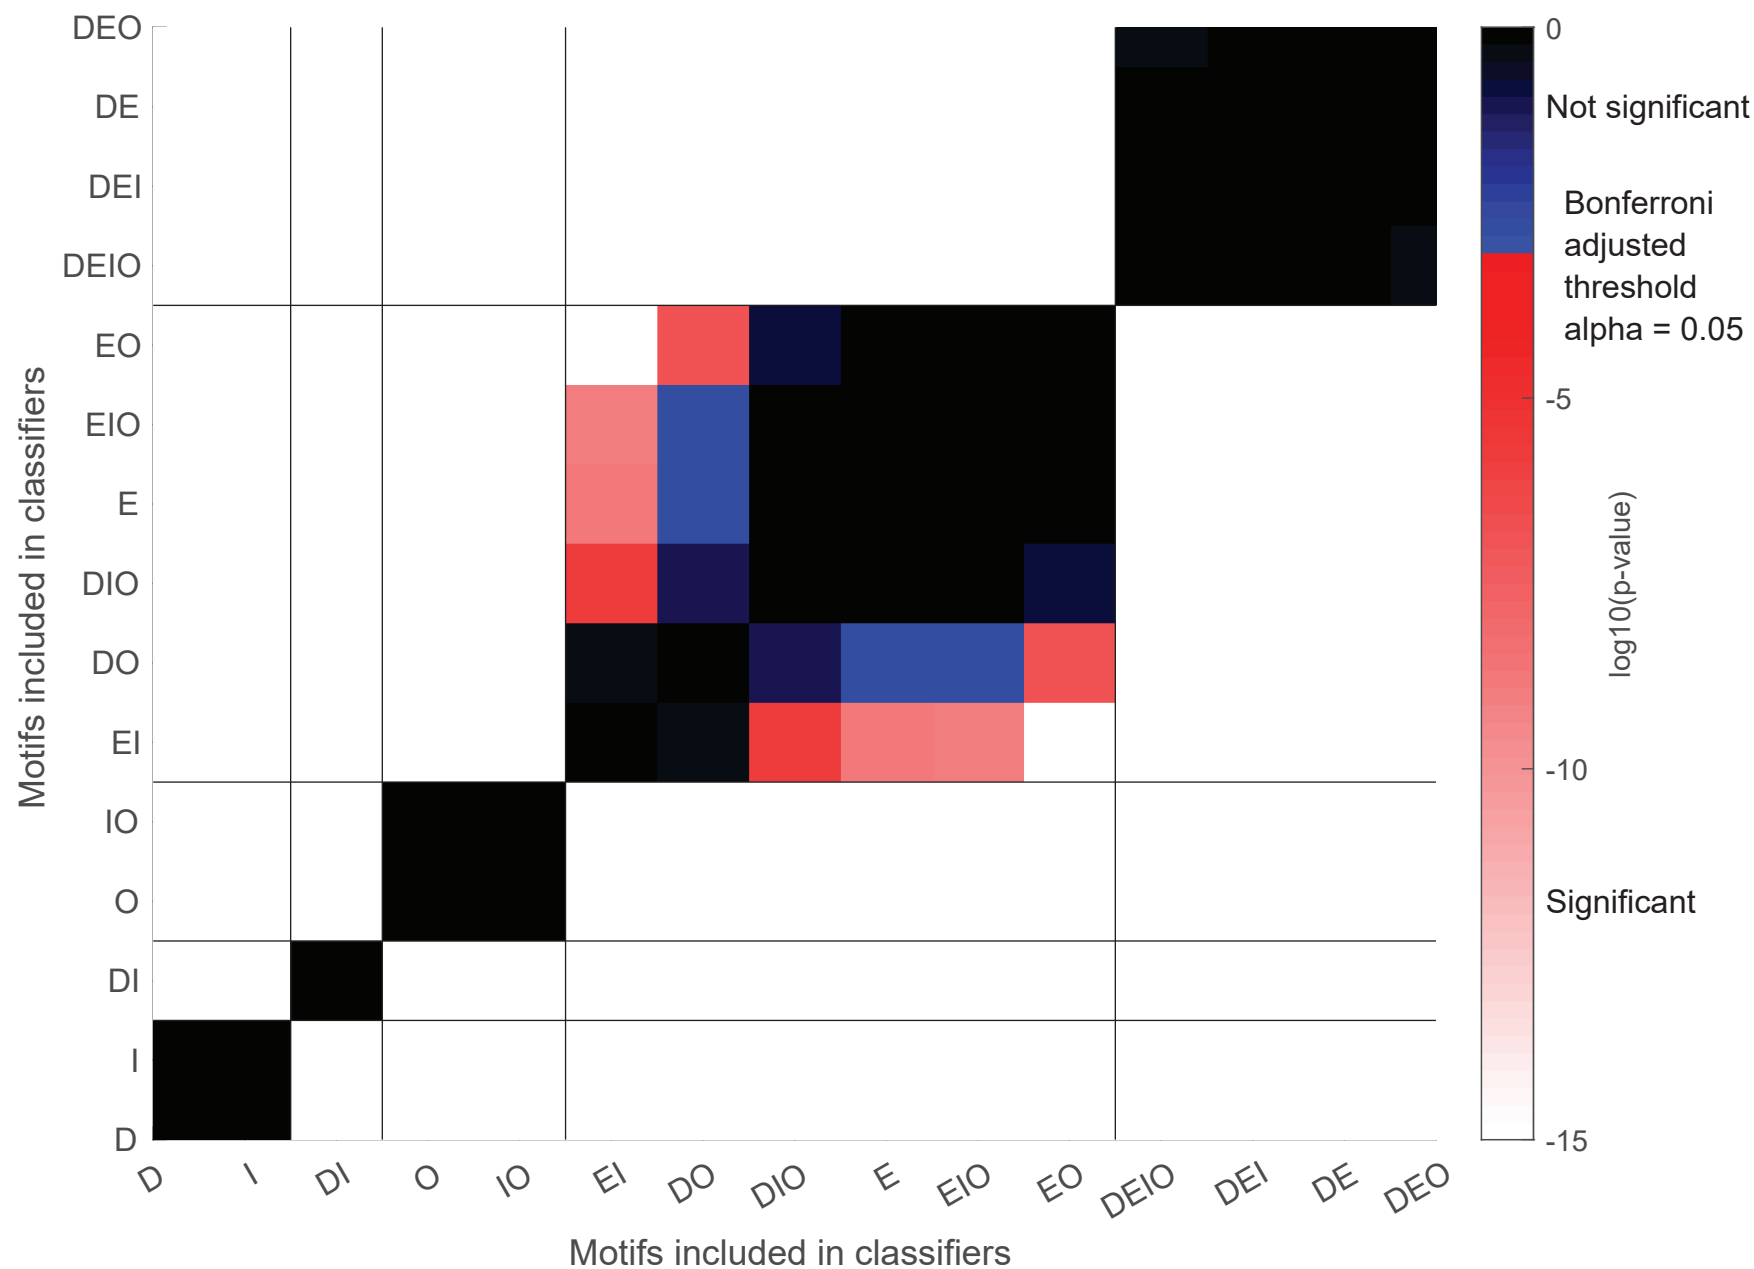

Supplement: supp [file elife-79152-supp-v1.zip]

# A

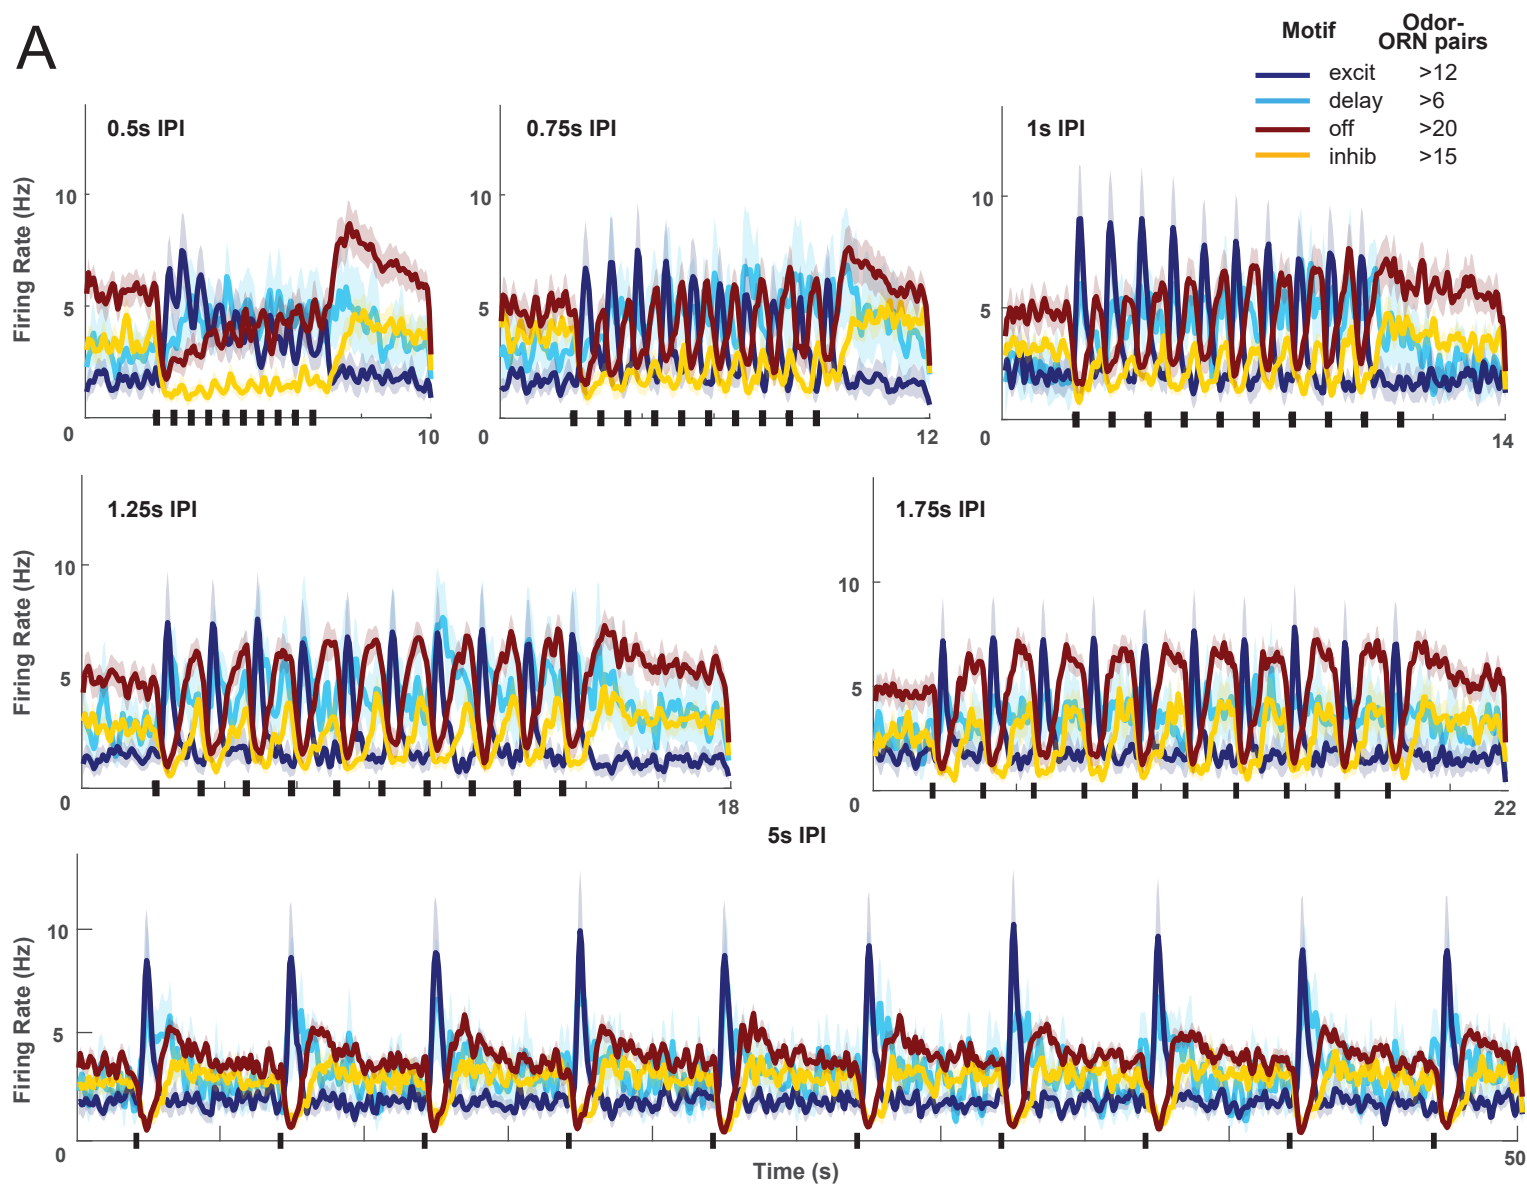

# B

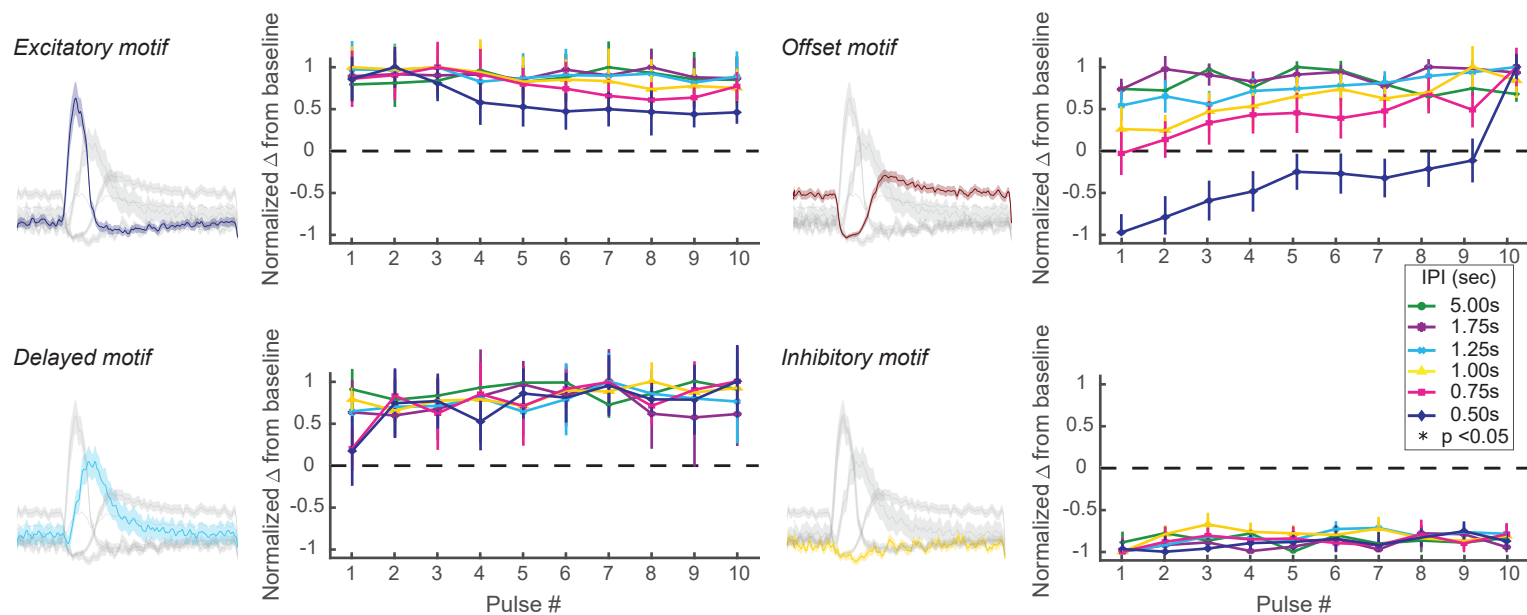

Supplement: supp [file elife-79152-supp-v1.zip]

# Basiconic Sensillum recording

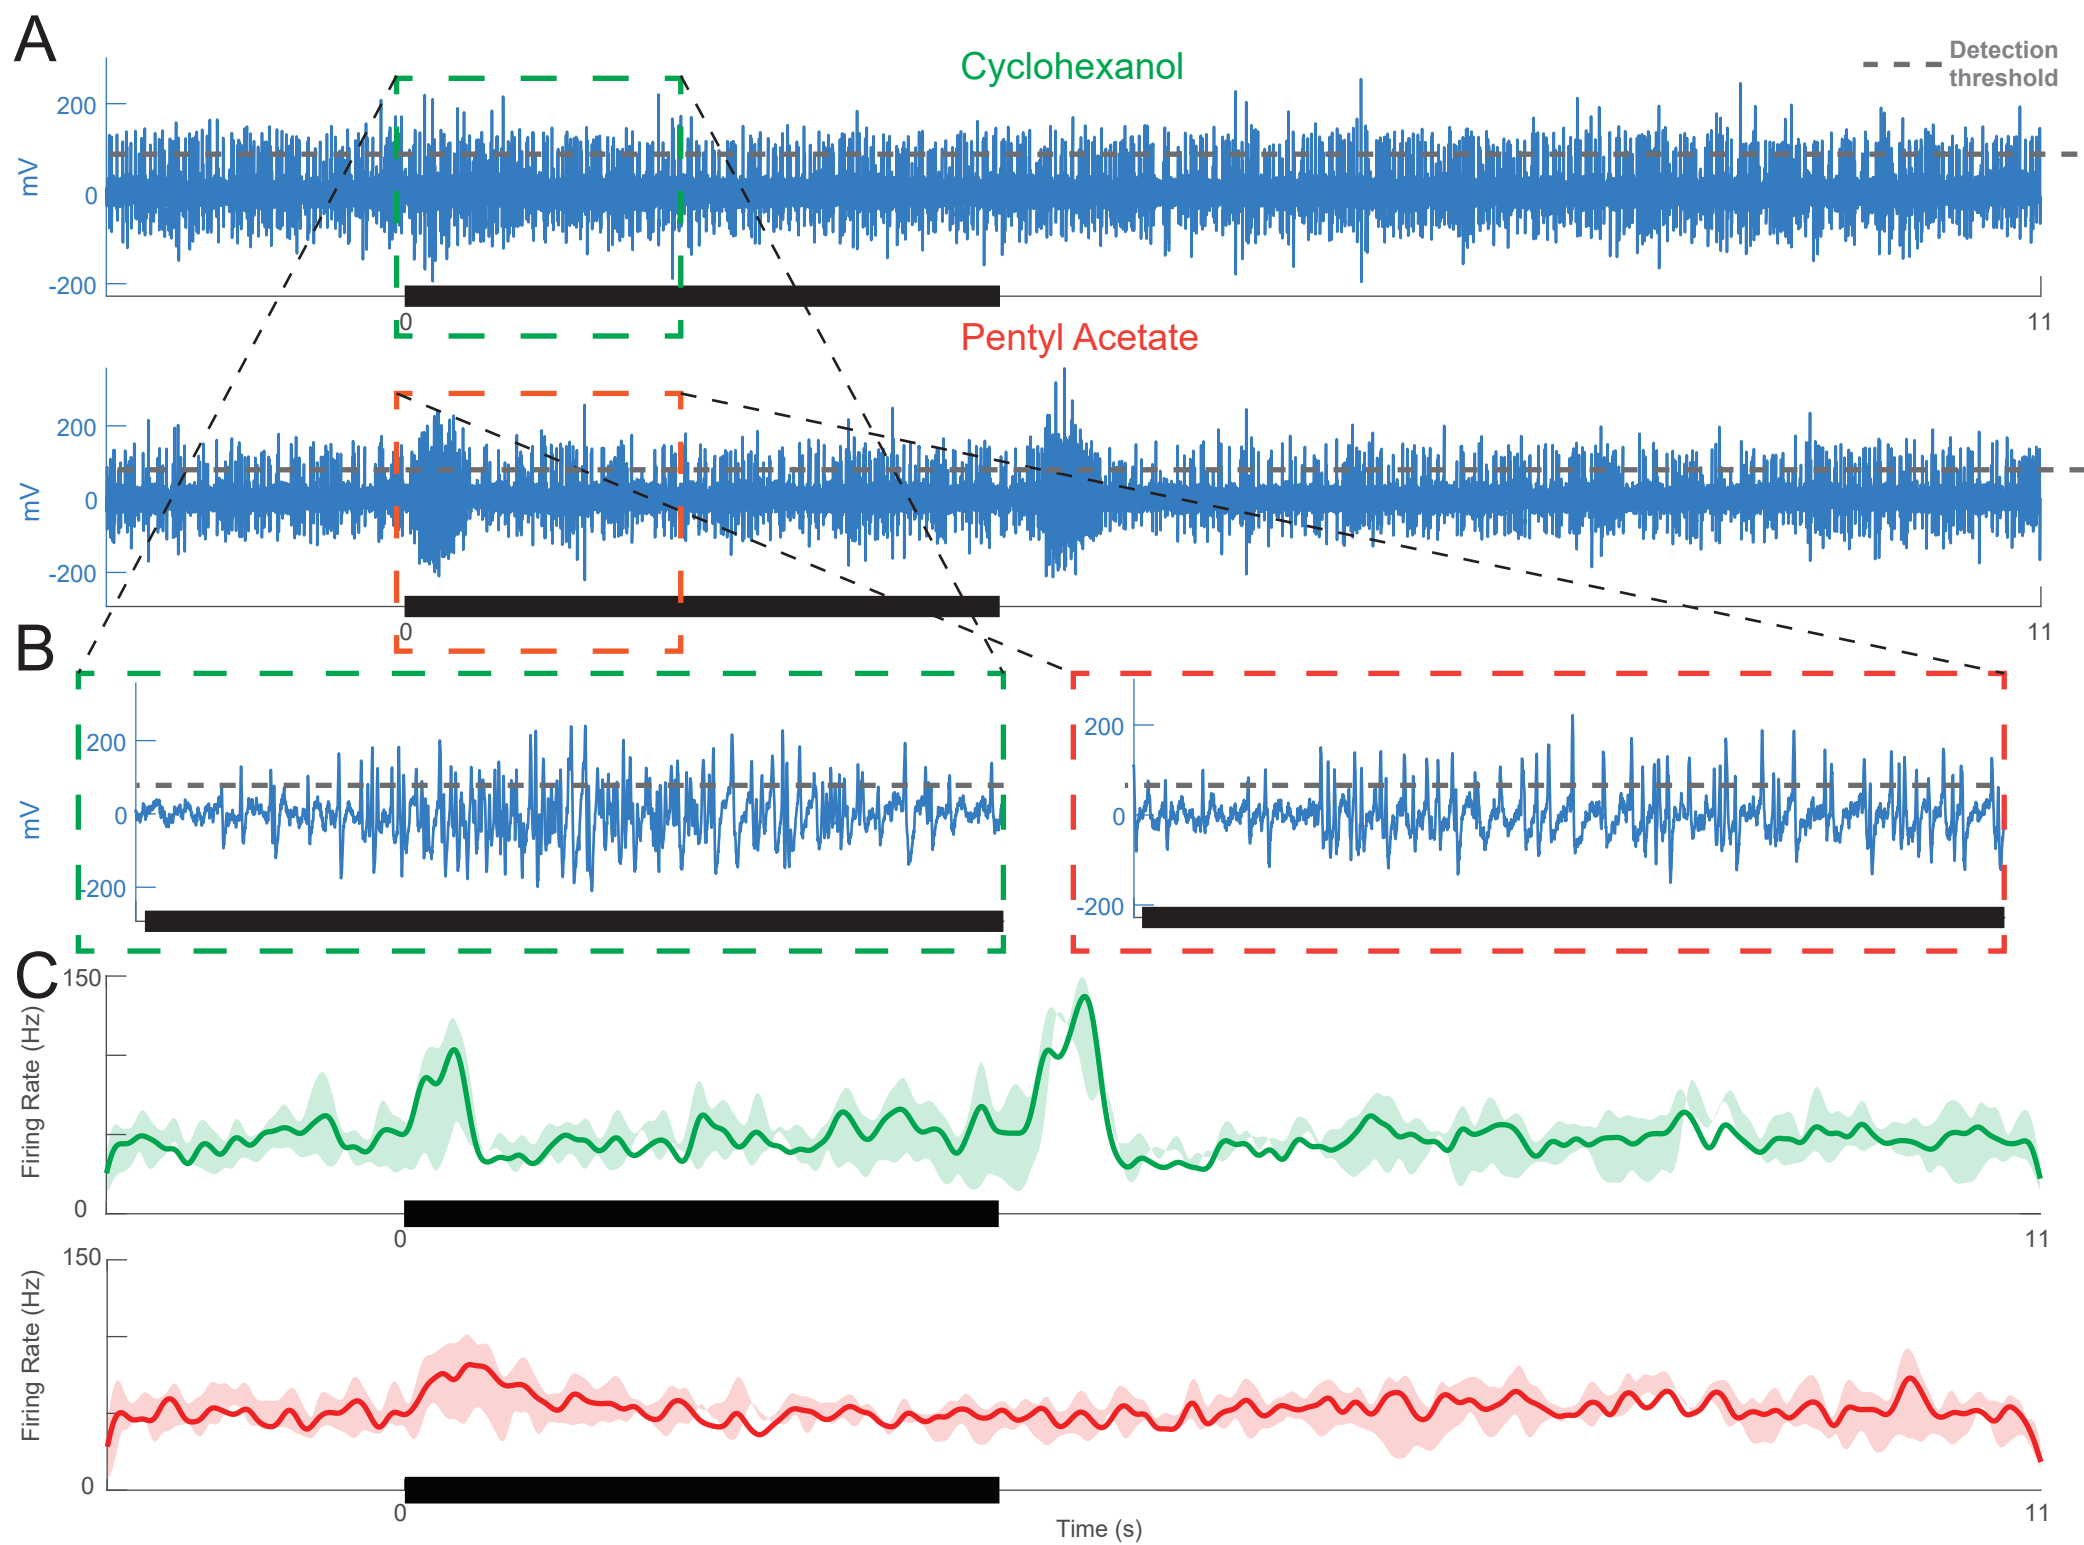

Supplement: supp [file elife-79152-supp-v1.zip]

Example ORN 1

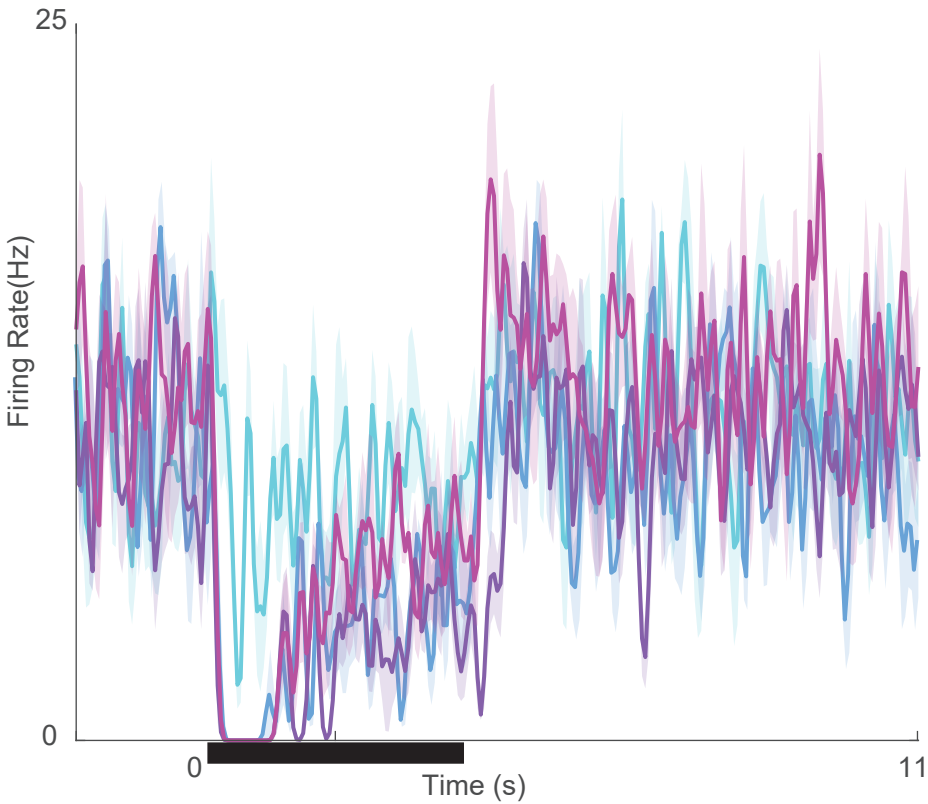

Example ORN 2

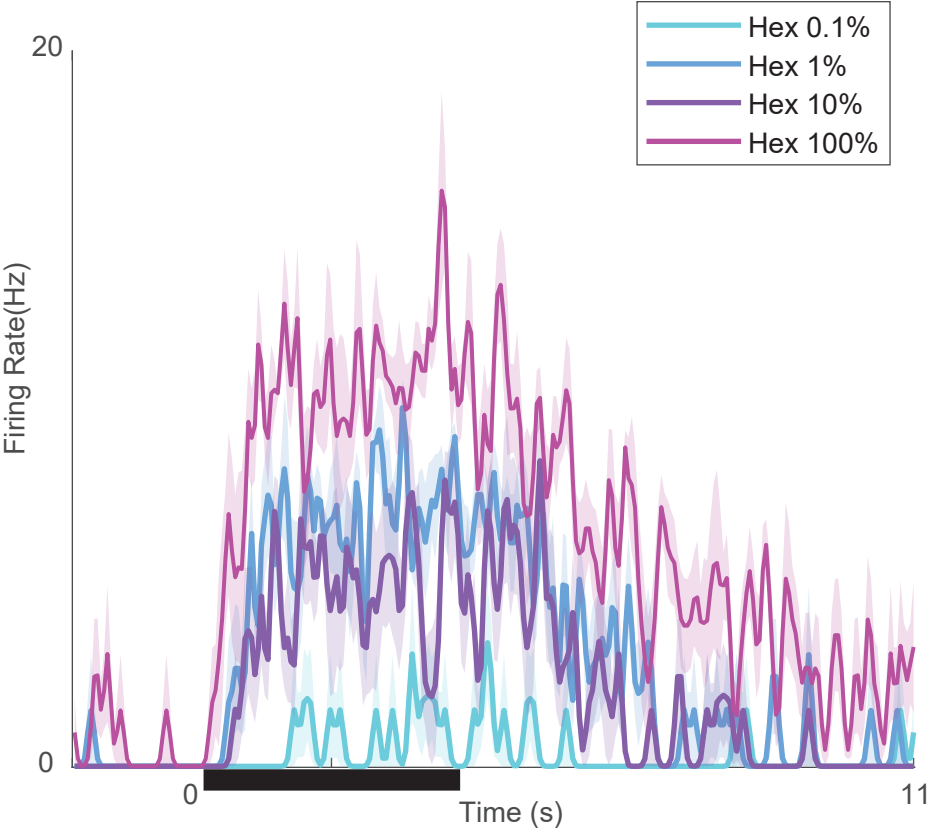

Supplement: supp [file elife-79152-supp-v1.zip]

A

Cyclohexanol

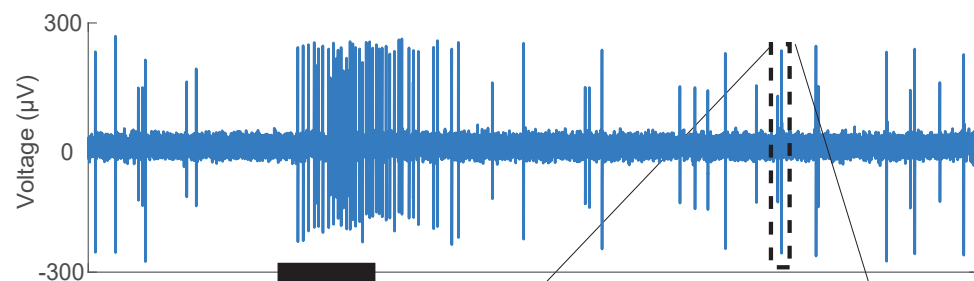

B

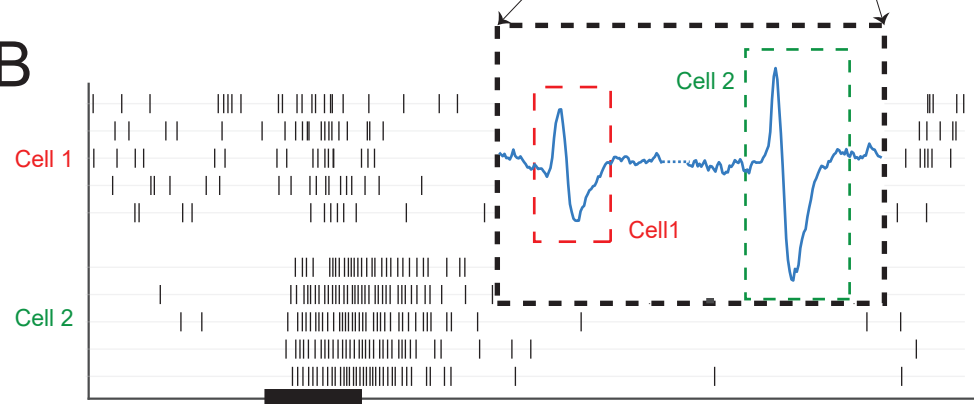

C

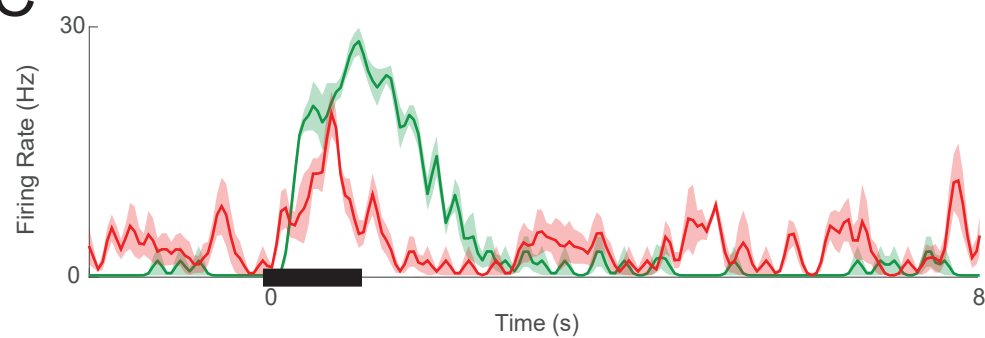

Octanol

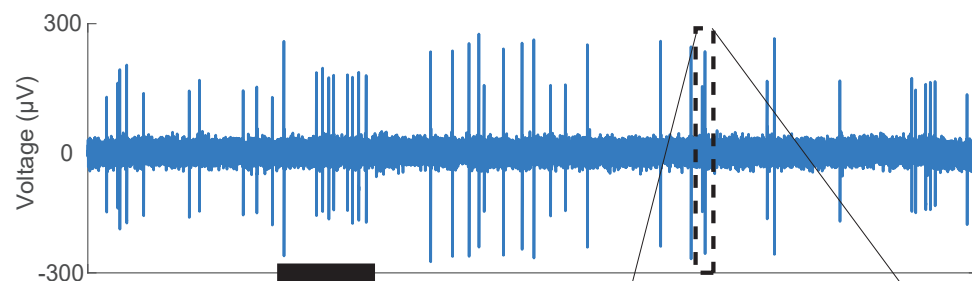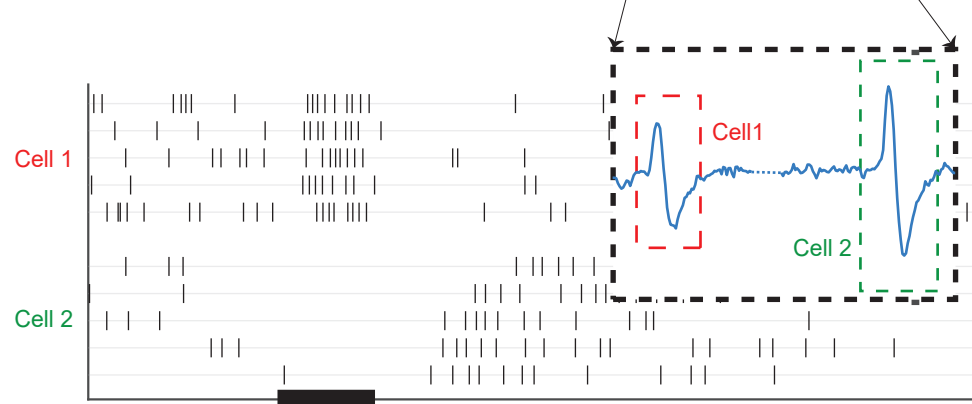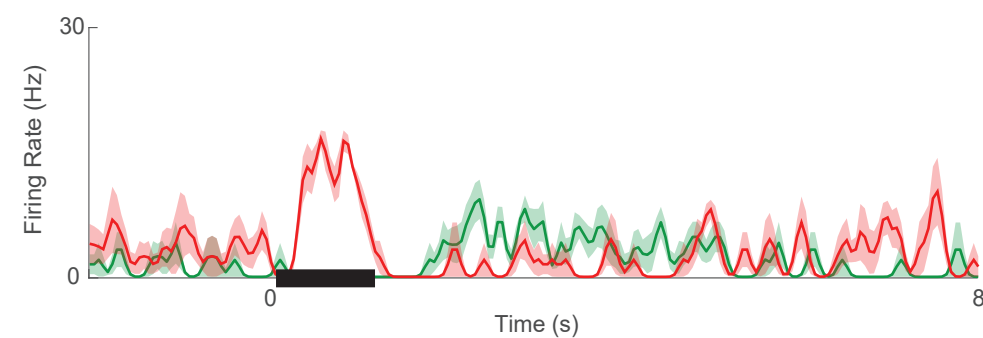

Supplement: supp [file elife-79152-supp-v1.zip]

### ORN Peak Responses

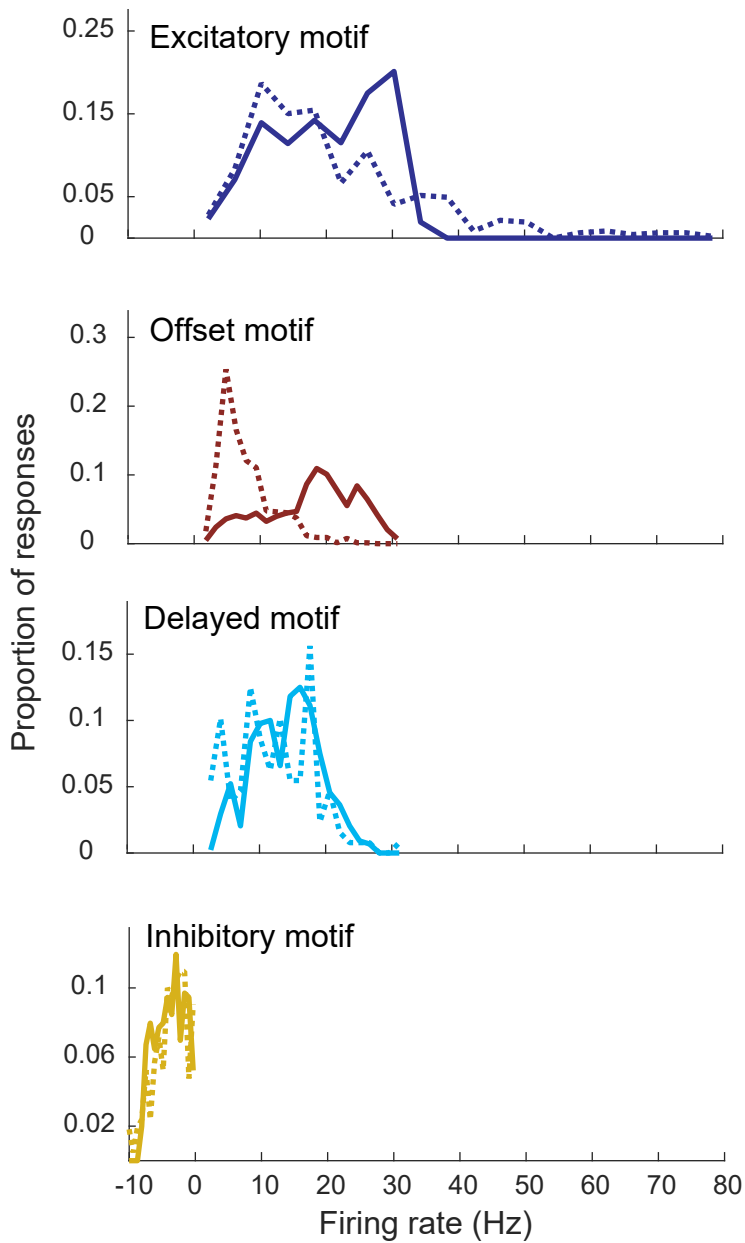

### ORN Response Latencies

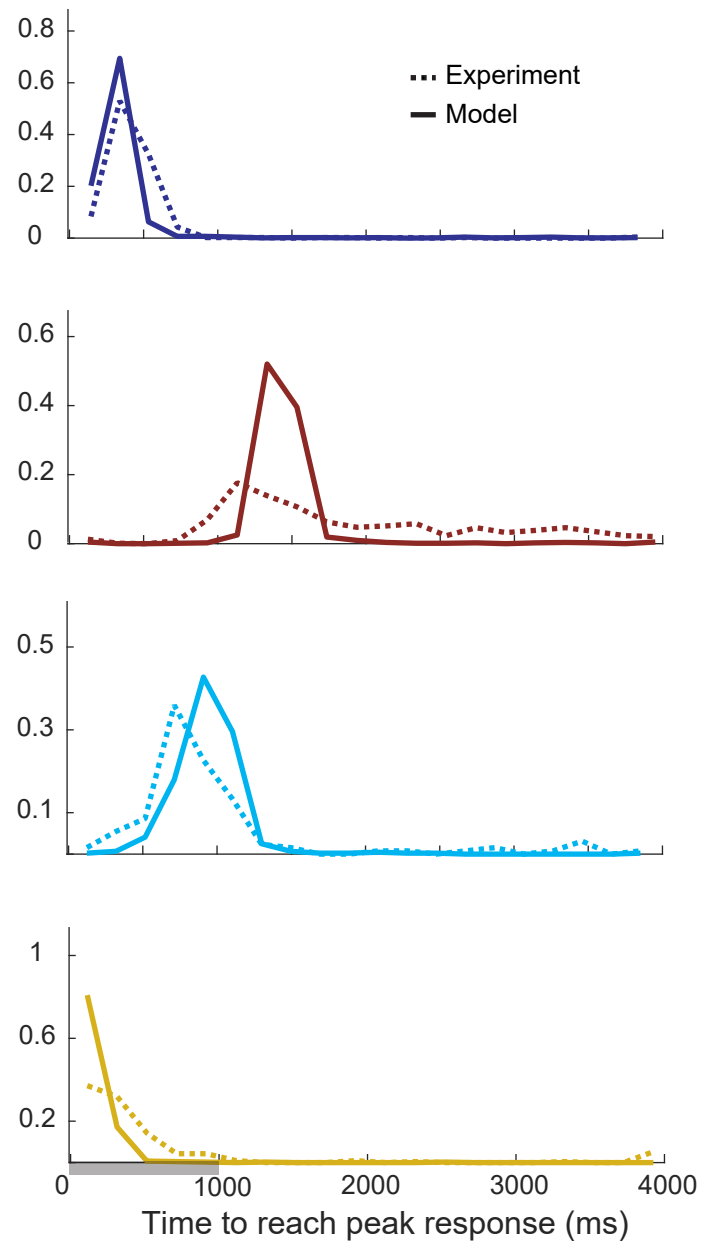

Supplement: supp [file elife-79152-supp-v1.zip]
